# Supplementary material
Source: HighWire-hosted journal article supplement (https://www.annfammed.org/highwire/filestream/632/field_highwire_adjunct_files/0/Mundt_Supp_Apps.pdf)

### Supplemental materials for:

Mundt MP, Zakletskaia LI. Professional communication networks and job satisfaction in primary care clinics. *Ann Fam Med.* 2019;17(5):428-435.

### Supplemental Appendix. The Borgatti-Everett Algorithm for Detecting Core-Periphery Structure

Let  $G = (V, E)$  be an undirected, unweighted graph of vertices  $V$  and edges  $E$ , and let  $A = (a_{ij})$  be the adjacency matrix of  $G$ , where  $a_{ij} = 1$  if node  $i$  and node  $j$  are linked, and 0, otherwise. Let  $\delta$  be a vector of length  $n$  with entries equal to one, or zero, if the corresponding node belongs to the core or the periphery, respectively. Furthermore, let  $\Delta = (\Delta_{ij})$  be the adjacency matrix of the ideal core/periphery network, where  $\Delta_{ij} = 1$  if  $\delta_i = 1$  and  $\delta_j = 1$ , and  $\Delta_{ij} = 0$  if  $\delta_i = 0$  and  $\delta_j = 0$  (i.e.,  $\Delta = \delta^T \delta$ , where  $\delta^T$  is the transpose of the row vector  $\delta$ ). Determining a network's core-periphery structure is an optimization problem aimed at finding the vector  $\delta$  such that  $\rho = \sum A_{ij} \Delta_{ij}$  (1) achieves its maximum value. The measure  $\rho$  is maximal when the adjacency matrix  $A$  and the matrix  $\Delta$  are identical, hence a network has core/periphery structure if  $\rho$  is large [1]. The Borgatti-Everett algorithm finds the vector  $\delta$  such that the correlation between the  $\Delta = \delta^T \delta$  matrix and the data (adjacency) matrix  $A$  is maximized. An idealized core-periphery structure is demonstrated in Figure 2.

Supplemental Figure. Idealized Core-Periphery Structure

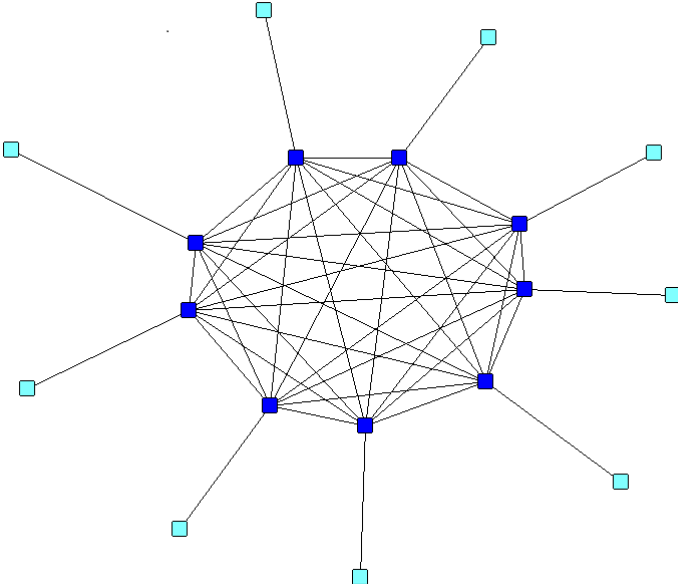

Supplement: Mundt_Supp_Apps.pdf [file Mundt_Supp_Apps.pdf]
